# Supplementary material for: Seeding-induced construction of N-doped TiO2-bronze@g-C3N4two-dimensional binary nanojunctions with enhanced photocatalytic activity
Source: Royal Society of Chemistry journal article supplement (doi:10.1039/c5ra04710b), 2015-01-01
Supplement: c5ra04710b1.pdf [file c5ra04710b1.pdf]

## Supplementary Data

### **Seeding-induced construction of N-doped TiO<sub>2</sub>-bronze@g-C<sub>3</sub>N<sub>4</sub> two-dimensional binary nanojunctions with enhanced photocatalytic activity**

Yilong Yang<sup>a</sup>, Yongli Li<sup>a,\*</sup>, Jinshu Wang<sup>a,\*</sup>, Yan Zhang<sup>a</sup>, Di He<sup>a</sup>, Junshu Wu<sup>a</sup>,  
Hongxing Dai<sup>b,\*</sup>

<sup>a</sup> Key Laboratory of Advanced Functional Materials, School of Materials Science and Engineering, Beijing University of Technology, Beijing, 100124, China

<sup>b</sup> Laboratory of Green Catalysis and Separation, Key Laboratory of Beijing on Regional Air Pollution Control, and Laboratory of Catalysis Chemistry and Nanoscience, Department of Chemistry and Chemical Engineering, College of Environmental and Energy Engineering, Beijing University of Technology, Beijing 100124, China

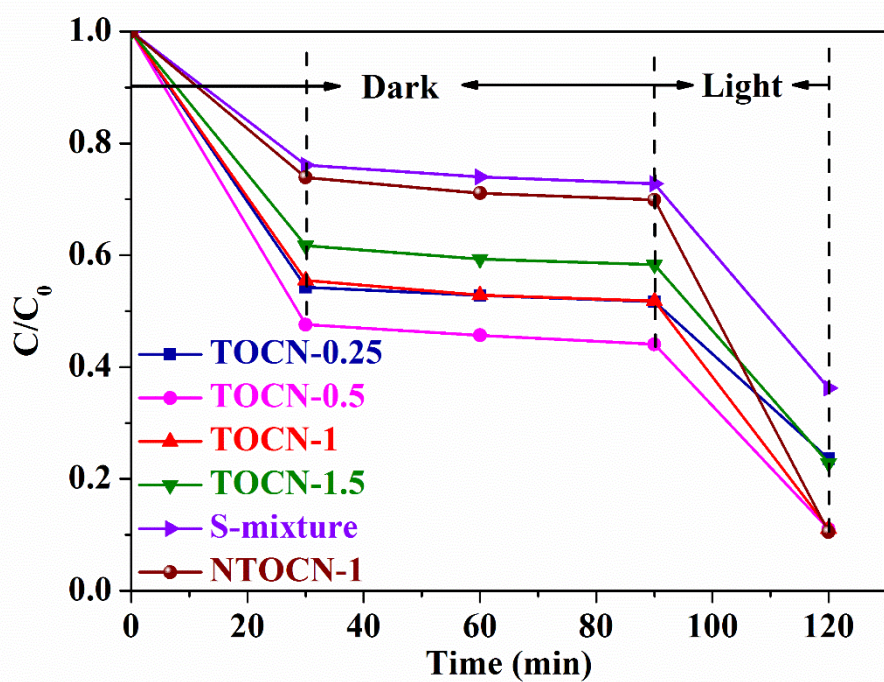

Fig.S1 process of thermodynamic equilibrium

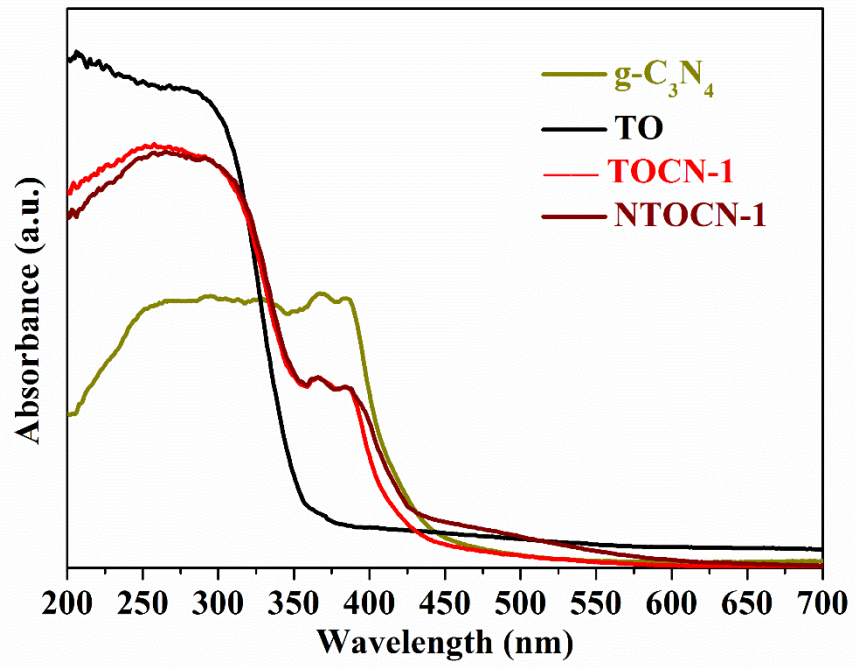

Fig.S2 UV-vis absorbance spectra of g-C<sub>3</sub>N<sub>4</sub>, TO, TOCN-1 and NTOCN-1 composites
